# Supplementary material
Source: PubMed Central journal article supplement (PMC7648336)

Supplemental Figure for:  
Biomarkers in Breast Cancer: An Integrated Analysis of Comprehensive Genomic Profiling and PD-L1 Immunohistochemistry  
Biomarkers in 312 Breast Cancer Patients  
Richard Sheng Poe Huang et al.

**Supplement Figure 1.** A) Represents next generation sequencing data of Patient A, a 59-year-old HR<sup>+</sup>/HER2<sup>-</sup> female breast carcinoma patient, who had a *PIK3CA* E545K mutation. This specific snapshot shows the *PIK3CA* E545K mutation. B) (hematoxylin and eosin stain, 200x magnification) and C) (PD-L1 SP142 CDx IHC, 200x magnification), are from a 49-year-old TNBC female patient who was positive for the PD-L1 SP142 CDx assay. The immune cells in this case are staining in a granular, punctate brown pattern with no tumor cells staining. This represents a case that is positive for the SP142 CDx assay with more than 1% tumor infiltration immune cells staining over the total tumor area.

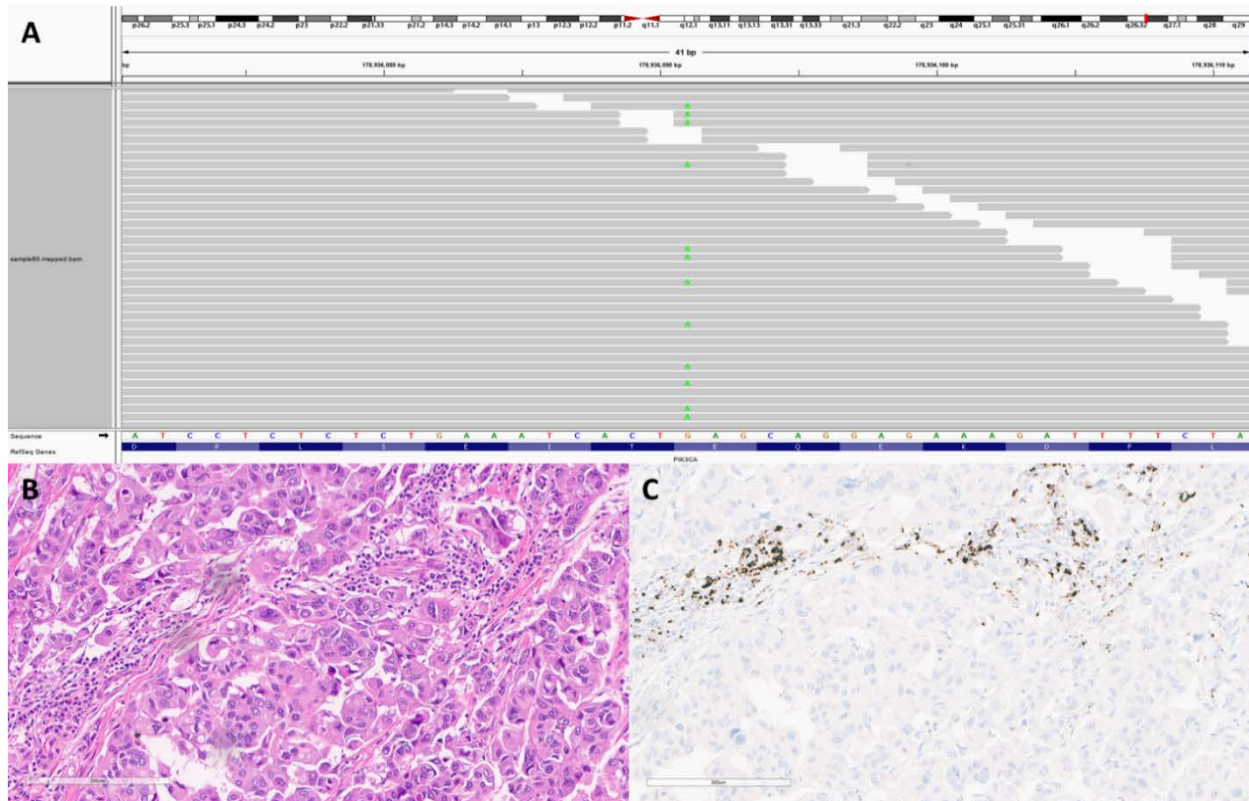

Supplement: ONCO-25-943-s001.pdf [file ONCO-25-943-s001.pdf]
