# Supplementary material
Source: PubMed Central journal article supplement (PMC7648336)
Supplement: ONCO-25-943-s002.pdf [file ONCO-25-943-s002.pdf]

Supplemental Tables for:

Biomarkers in Breast Cancer: An Integrated Analysis of Comprehensive Genomic Profiling and PD-L1 Immunohistochemistry  
Biomarkers in 312 Breast Cancer Patients

Richard Sheng Poe Huang et al.

**Supplemental Table 1.** Prevalence of genomic alterations of top 20 genes in HR<sup>+</sup>/HER2<sup>-</sup>, TNBC, and HER2<sup>+</sup> disease subsets with Bonferroni p-value adjustments for multiple comparisons

| Gene           | Percent TNBC patients with mutation (n=121) | Percent HR <sup>+</sup> /HER2 <sup>-</sup> patients with mutation (n=159) | Percent HER2 <sup>+</sup> patients with mutation (n=32) | Fisher's Exact Test (adjusted p-value) TNBC and HR <sup>+</sup> /HER2 <sup>-</sup> | Fisher's Exact Test (adjusted p-value) HR <sup>+</sup> /HER2 <sup>-</sup> and HER2 <sup>+</sup> | Fisher's Exact Test (adjusted p-value) TNBC and HER2 <sup>+</sup> |
|----------------|---------------------------------------------|---------------------------------------------------------------------------|---------------------------------------------------------|------------------------------------------------------------------------------------|-------------------------------------------------------------------------------------------------|-------------------------------------------------------------------|
| <i>TP53</i>    | 86.8% (105)                                 | 36.5% (58)                                                                | 71.9% (23)                                              | <0.001                                                                             | 1                                                                                               | 1                                                                 |
| <i>PIK3CA</i>  | 18.2% (22)                                  | 38.4% (61)                                                                | 46.9% (15)                                              | 0.020                                                                              | 1                                                                                               | 0.116                                                             |
| <i>RAD21</i>   | 31.4% (38)                                  | 30.2% (48)                                                                | 31.3% (10)                                              | 1                                                                                  | 1                                                                                               | 1                                                                 |
| <i>MYC</i>     | 26.4% (32)                                  | 19.5% (31)                                                                | 34.4% (11)                                              | 1                                                                                  | 1                                                                                               | 1                                                                 |
| <i>NBN</i>     | 17.4% (21)                                  | 27% (43)                                                                  | 15.6% (5)                                               | 1                                                                                  | 1                                                                                               | 1                                                                 |
| <i>WHSC1L1</i> | 9.9% (12)                                   | 23.9% (38)                                                                | 15.6% (5)                                               | 0.158                                                                              | 1                                                                                               | 1                                                                 |
| <i>CCND1</i>   | 8.3% (10)                                   | 25.2% (40)                                                                | 12.5% (4)                                               | 0.015                                                                              | 1                                                                                               | 1                                                                 |
| <i>FGF19</i>   | 8.3% (10)                                   | 23.3% (37)                                                                | 12.5% (4)                                               | 0.065                                                                              | 1                                                                                               | 1                                                                 |
| <i>FGF3</i>    | 8.3% (10)                                   | 23.3% (37)                                                                | 12.5% (4)                                               | 0.065                                                                              | 1                                                                                               | 1                                                                 |
| <i>GATA3</i>   | 10.7% (13)                                  | 22.6% (36)                                                                | 9.4% (3)                                                | 0.651                                                                              | 1                                                                                               | 1                                                                 |
| <i>ZNF703</i>  | 6.6% (8)                                    | 24.5% (39)                                                                | 9.4% (3)                                                | 0.003                                                                              | 0.779                                                                                           | 1                                                                 |
| <i>FGF4</i>    | 7.4% (9)                                    | 20.8% (33)                                                                | 15.6% (5)                                               | 0.129                                                                              | 1                                                                                               | 1                                                                 |
| <i>FGFR1</i>   | 8.3% (10)                                   | 20.8% (33)                                                                | 9.4% (3)                                                | 0.257                                                                              | 1                                                                                               | 1                                                                 |
| <i>CDH1</i>    | 9.1% (11)                                   | 19.5% (31)                                                                | 3.1% (1)                                                | 1                                                                                  | 0.195                                                                                           | 1                                                                 |
| <i>ESR1</i>    | 3.3% (4)                                    | 22% (35)                                                                  | 9.4% (3)                                                | <0.001                                                                             | 1                                                                                               | 1                                                                 |
| <i>LYN</i>     | 14% (17)                                    | 13.2% (21)                                                                | 12.5% (4)                                               | 1                                                                                  | 1                                                                                               | 1                                                                 |
| <i>DDR2</i>    | 17.4% (21)                                  | 11.3% (18)                                                                | 6.3% (2)                                                | 1                                                                                  | 1                                                                                               | 1                                                                 |
| <i>PTEN</i>    | 14.9% (18)                                  | 15.7% (25)                                                                | 6.3% (2)                                                | 1                                                                                  | 1                                                                                               | 1                                                                 |
| <i>GNAS</i>    | 14.9% (18)                                  | 11.9% (19)                                                                | 9.4% (3)                                                | 1                                                                                  | 1                                                                                               | 1                                                                 |
| <i>RB1</i>     | 15.7% (19)                                  | 10.7% (17)                                                                | 3.1% (1)                                                | 1                                                                                  | 1                                                                                               | 1                                                                 |

**Supplemental Table 2.** Prevalence of genomic alterations in the top 20 genes in TNBC/PD-L1<sup>+</sup> and TNBC/PD-L1<sup>-</sup> disease subsets

| Gene           | Percent PDL1 <sup>+</sup> patients with mutation (n=52) | Percent PDL1 <sup>-</sup> patients with mutation (n=69) | Fisher's Exact Test (p-value) |
|----------------|---------------------------------------------------------|---------------------------------------------------------|-------------------------------|
| <i>TP53</i>    | 90.4% (47)                                              | 84.1% (58)                                              | 0.419                         |
| <i>RAD21</i>   | 25% (13)                                                | 37.7% (26)                                              | 0.171                         |
| <i>MYC</i>     | 25% (13)                                                | 27.5% (19)                                              | 0.836                         |
| <i>PIK3CA</i>  | 15.4% (8)                                               | 20.3% (14)                                              | 0.635                         |
| <i>NBN</i>     | 9.6% (5)                                                | 23.2% (16)                                              | 0.057                         |
| <i>DDR2</i>    | 21.2% (11)                                              | 14.5% (10)                                              | 0.346                         |
| <i>RB1</i>     | 9.6% (5)                                                | 20.3% (14)                                              | 0.134                         |
| <i>GNAS</i>    | 13.5% (7)                                               | 17.4% (12)                                              | 0.621                         |
| <i>PTEN</i>    | 15.4% (8)                                               | 14.5% (10)                                              | 1                             |
| <i>MCL1</i>    | 11.5% (6)                                               | 15.9% (11)                                              | 0.601                         |
| <i>LYN</i>     | 9.6% (5)                                                | 17.4% (12)                                              | 0.294                         |
| <i>MLL2</i>    | 11.5% (6)                                               | 11.6% (8)                                               | 1                             |
| <i>NOTCH2</i>  | 13.5% (7)                                               | 10.1% (7)                                               | 0.581                         |
| <i>GATA3</i>   | 13.5% (7)                                               | 8.7% (6)                                                | 0.555                         |
| <i>FH</i>      | 17.3% (9)                                               | 5.8% (4)                                                | 0.072                         |
| <i>PARP1</i>   | 9.6% (5)                                                | 11.6% (8)                                               | 0.776                         |
| <i>IKBKE</i>   | 11.5% (6)                                               | 10.1% (7)                                               | 1                             |
| <i>NTRK1</i>   | 9.6% (5)                                                | 11.6% (8)                                               | 0.776                         |
| <i>BRCA2</i>   | 9.6% (5)                                                | 10.1% (7)                                               | 1                             |
| <i>WHSC1L1</i> | 11.5% (6)                                               | 8.7% (6)                                                | 0.76                          |
